# Supplementary material for: Sustained enhancement of photosynthesis in coffee trees grown under free-air CO2 enrichment conditions: disentangling the contributions of stomatal, mesophyll, and biochemical limitations
Source: PubMed Central journal article supplement (PMC4682438; doi:10.1093/jxb/erv463), 2015-10-26
Supplement: supp_erv463_Supplementary_material.pdf [file supp_erv463_Supplementary_material.pdf]

## Supplementary Data

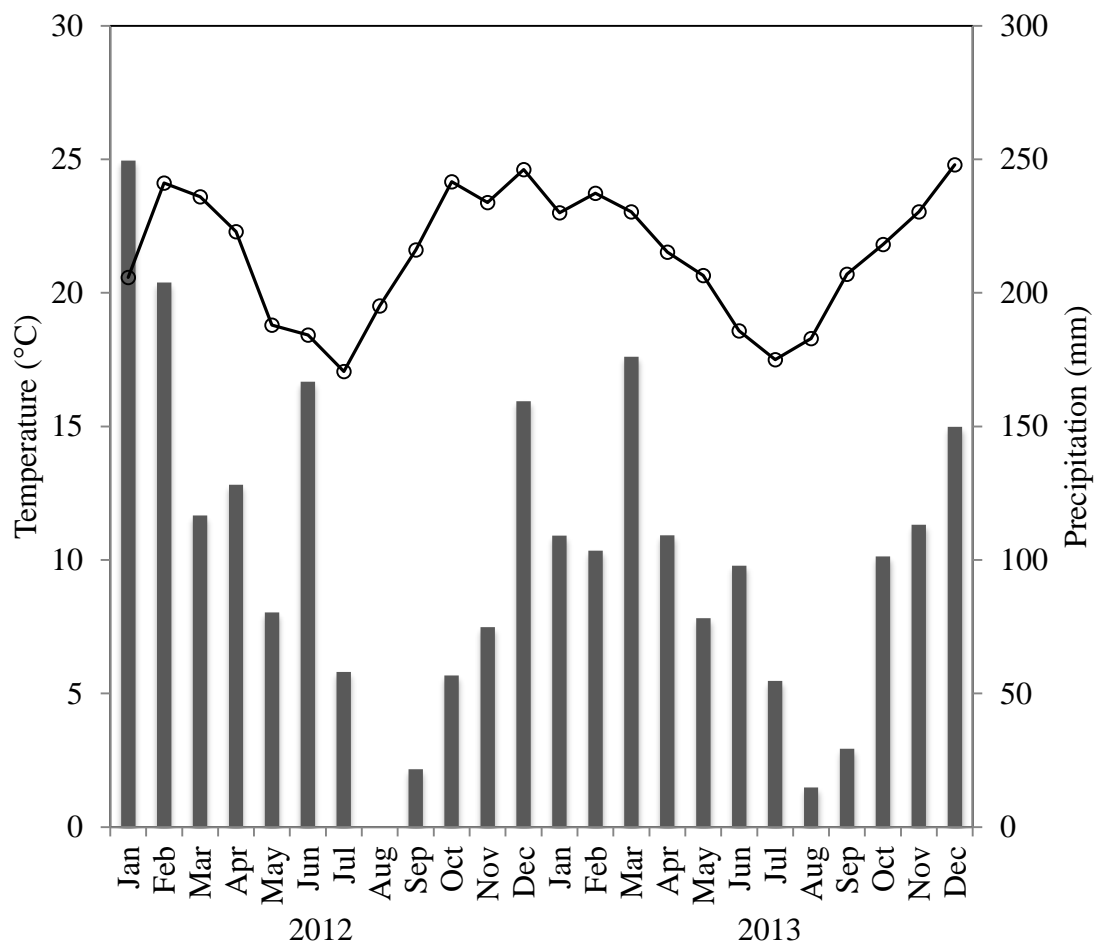

**Supplementary Figure S1.** The time course of mean monthly air temperature and precipitation at the experimental site from January 2012 through December 2013.

**Supplementary Table S1.** The results of ANOVA (P-values) for the effects of cultivar (Cult), CO<sub>2</sub> concentration (CO<sub>2</sub>) and their interaction are presented for the tested net CO<sub>2</sub> assimilation rate (A), stomatal conductance to CO<sub>2</sub> (g<sub>s</sub>), ratio of photorespiration-to-gross photosynthetic rate (R<sub>p</sub>/A<sub>gross</sub>), electron transport rate (ETR), photochemical quenching coefficient (q<sub>p</sub>), capture efficiency of excitation energy by open photosystem II reaction centres (F<sub>v</sub>'/F<sub>m</sub>'), stomatal limitation (l<sub>s</sub>), mesophyll limitation (l<sub>m</sub>), biochemical limitation (l<sub>b</sub>), carbohydrate and malate pools, mesophyll conductance estimated using the Exhaustive Dual Optimization (EDO) curve-fitting technique (g<sub>m\_EDO</sub>) or the method that was proposed by Harley *et al.* (1992) (g<sub>m\_Harley</sub>), the maximum apparent carboxylation capacity (V<sub>cmax</sub>) and the *in vivo* maximum rate of carboxylation as limited by electron transport (J<sub>max</sub>) both on a chloroplast [CO<sub>2</sub>] (C<sub>c</sub>) or an intercellular (C<sub>i</sub>) basis, the chloroplastic [CO<sub>2</sub>] (C<sub>c</sub>), the intercellular [CO<sub>2</sub>] (C<sub>i</sub>), and C<sub>c</sub> or C<sub>i</sub> or transition (C<sub>c\_trans</sub> or C<sub>i\_trans</sub>).

| Parameter                          | February     |                 |                        | August |                 |                        |       |
|------------------------------------|--------------|-----------------|------------------------|--------|-----------------|------------------------|-------|
|                                    | Cult         | CO <sub>2</sub> | Cult x CO <sub>2</sub> | Cult   | CO <sub>2</sub> | Cult x CO <sub>2</sub> |       |
| A                                  | 8-9:00 h     | 0.822           | <.0001                 | 0.655  | 0.553           | 0.000                  | 0.532 |
|                                    | 10-11:00 h   | 0.804           | 0.011                  | 0.072  | 0.001           | 0.001                  | 0.081 |
|                                    | 13-14:00 h   | 0.104           | 0.001                  | 0.037  | 0.026           | 0.013                  | 0.960 |
|                                    | 16-17:00 h   | 0.435           | 0.219                  | 0.123  | 0.065           | 0.010                  | 0.477 |
|                                    | Diurnal mean | 0.452           | <.0001                 | 0.865  | <.0001          | <.0001                 | 0.401 |
| g <sub>s</sub>                     | 8-9:00 h     | 0.929           | 0.788                  | 0.765  | 0.944           | 0.031                  | 0.313 |
|                                    | 10-11:00 h   | 0.325           | 0.001                  | 0.040  | 0.006           | 0.318                  | 0.455 |
|                                    | 13-14:00 h   | 0.084           | 0.913                  | 0.056  | 0.090           | 0.998                  | 0.684 |
|                                    | 16-17:00 h   | 0.816           | 0.011                  | 0.301  | 0.121           | 0.257                  | 0.698 |
|                                    | Diurnal mean | 0.295           | 0.080                  | 0.785  | 0.002           | 0.066                  | 0.273 |
| R <sub>p</sub> /A <sub>gross</sub> | 8-9:00 h     | 0.597           | 0.003                  | 0.366  | 0.896           | 0.005                  | 0.304 |
|                                    | 10-11:00 h   | 0.846           | 0.001                  | 0.719  | 0.007           | 0.001                  | 0.058 |
|                                    | 13-14:00 h   | 0.127           | 0.089                  | 0.127  | 0.019           | 0.034                  | 0.807 |
|                                    | 16-17:00 h   | 0.269           | 0.108                  | 0.123  | 0.711           | 0.008                  | 0.383 |
|                                    | Diurnal mean | 0.881           | <.0001                 | 0.585  | 0.007           | <.0001                 | 0.068 |
| ETR                                | 8-9:00 h     | 0.754           | 0.771                  | 0.378  | 0.774           | 0.467                  | 0.063 |
|                                    | 10-11:00 h   | 0.254           | 0.275                  | 0.878  | 0.013           | 0.620                  | 0.979 |
|                                    | 13-14:00 h   | 0.683           | 0.095                  | 0.828  | 0.500           | 0.500                  | 0.516 |
|                                    | 16-17:00 h   | 0.054           | 0.802                  | 0.323  | 0.597           | 0.692                  | 0.744 |
|                                    | Diurnal mean | 0.992           | 0.461                  | 0.891  | 0.371           | 0.711                  | 0.145 |
| q <sub>p</sub>                     | 8-9:00 h     | 0.890           | 0.623                  | 0.859  | 0.875           | 0.185                  | 0.343 |
|                                    | 10-11:00 h   | 0.775           | 0.228                  | 0.827  | 0.649           | 0.755                  | 0.310 |
|                                    | 13-14:00 h   | 0.580           | 0.060                  | 0.660  | 0.384           | 0.187                  | 0.489 |
|                                    | 16-17:00 h   | 0.032           | 0.426                  | 0.276  | 0.398           | 0.738                  | 0.683 |
|                                    | Diurnal mean | 0.373           | 0.198                  | 0.662  | 0.962           | 0.109                  | 0.109 |

|                                 |                                       |       |        |        |       |        |       |
|---------------------------------|---------------------------------------|-------|--------|--------|-------|--------|-------|
| $F_v'/F_m'$                     | 8-9:00 h                              | 0.420 | 0.185  | 0.060  | 0.441 | 0.181  | 0.670 |
|                                 | 10-11:00 h                            | 0.031 | 0.613  | 0.613  | 0.613 | 0.364  | 0.157 |
|                                 | 13-14:00 h                            | 0.152 | 0.833  | 0.674  | 0.891 | 0.147  | 0.891 |
|                                 | 16-17:00 h                            | 0.849 | 0.174  | 0.899  | 0.548 | 0.968  | 0.968 |
|                                 | Diurnal mean                          | 0.145 | 0.363  | 0.273  | 0.327 | 0.119  | 0.638 |
| LS                              |                                       | 0.350 | 0.005  | 0.004  | 0.566 | 0.068  | 0.986 |
| LM                              | growth CO <sub>2</sub>                | 0.000 | <.0001 | <.0001 | 0.763 | 0.002  | 0.861 |
| LB                              |                                       | 0.376 | 0.250  | 0.157  | 0.250 | 0.173  | 0.924 |
| Glucose                         | 6:00 h                                | 0.697 | 0.013  | 0.108  | -     | -      | -     |
|                                 | 12:00 h                               | 0.956 | 0.017  | 0.418  | 0.590 | 0.838  | 0.688 |
|                                 | 18:00 h                               | 0.816 | 0.047  | 0.381  | -     | -      | -     |
| Fructose                        | 6:00 h                                | 0.470 | 0.497  | 0.396  | -     | -      | -     |
|                                 | 12:00 h                               | 0.035 | 0.017  | 0.260  | 0.136 | 0.096  | 0.148 |
|                                 | 18:00 h                               | 0.382 | 0.302  | 0.548  | -     | -      | -     |
| Sucrose                         | 6:00 h                                | 0.053 | 0.016  | 0.033  | -     | -      | -     |
|                                 | 12:00 h                               | 0.132 | 0.010  | 0.542  | 0.917 | 0.997  | 0.074 |
|                                 | 18:00 h                               | 0.026 | 0.172  | 0.682  | -     | -      | -     |
| Starch                          | 6:00 h                                | 0.542 | 0.018  | 0.059  | -     | -      | -     |
|                                 | 12:00 h                               | 0.845 | 0.088  | 0.016  | 0.577 | 0.001  | 0.619 |
|                                 | 18:00 h                               | 0.617 | 0.037  | 0.085  | -     | -      | -     |
| Malate                          | 6:00 h                                | 0.023 | 0.028  | 0.147  | -     | -      | -     |
|                                 | 12:00 h                               | 0.237 | 0.001  | 0.266  | 0.405 | 0.012  | 0.151 |
|                                 | 18:00 h                               | 0.017 | 0.014  | 0.748  | -     | -      | -     |
| $g_{m\_EDO}$                    |                                       | 0.627 | 0.049  | 0.636  | 0.835 | 0.467  | 0.447 |
| $g_{m\_Harley}$                 |                                       | 0.324 | 0.080  | 0.551  | 0.277 | 0.090  | 0.742 |
| $V_{cmax}$ ( $C_c$ basis)       |                                       | 0.261 | 0.100  | 0.626  | 0.715 | 0.477  | 0.356 |
| $J_{max}$ ( $C_c$ basis)        |                                       | 0.467 | 0.052  | 0.488  | -     | -      | -     |
| $C_c$ at growth CO <sub>2</sub> |                                       | 0.042 | 0.013  | 0.375  | 0.586 | 0.010  | 0.688 |
| $C_{c\_trans}$                  |                                       | 0.166 | 0.001  | 0.165  | -     | -      | -     |
| $V_{cmax}$ ( $C_i$ basis)       |                                       | 0.748 | 0.341  | 0.261  | 0.210 | 0.102  | 0.867 |
| $J_{max}$ ( $C_i$ basis)        |                                       | 0.803 | 0.639  | 0.928  | -     | -      | -     |
| $C_i$ at growth CO <sub>2</sub> |                                       | 0.551 | <.0001 | 0.053  | 0.117 | 0.022  | 0.440 |
| $C_{i\_trans}$                  |                                       | 0.492 | 0.742  | 0.128  | -     | -      | -     |
| LS                              | Different from growth CO <sub>2</sub> | 0.228 | 0.008  | 0.001  | 0.728 | 0.003  | 0.418 |
| LM                              |                                       | 0.000 | <.0001 | <.0001 | 0.541 | <.0001 | 0.246 |
| LB                              |                                       | 0.541 | 0.873  | 0.026  | 0.190 | 0.250  | 0.735 |

**Supplementary Table S2.** The effect of elevated (550  $\mu\text{mol mol}^{-1}$ ) or ambient (390  $\mu\text{mol mol}^{-1}$ ) [ $\text{CO}_2$ ] on some photosynthetic parameters of two coffee cultivars (Catuaí and Obatã) growing in a FACE trial during the growing season (February) and winter (August): the maximum apparent carboxylation capacity ( $V_{\text{cmax}}$ ) and the *in vivo* maximum rate of carboxylation as limited by electron transport ( $J_{\text{max}}$ ), both on a intercellular [ $\text{CO}_2$ ] basis; and the internal [ $\text{CO}_2$ ] ( $C_i$ ) and  $C_i$  of transition ( $C_{i\_trans}$ ). Data for  $J_{\text{max}}$  and  $C_{i\_trans}$  were not obtained in August.  $V_{\text{cmax}}$  and  $J_{\text{max}}$  were normalised to 25°C using the temperature response equations from Sharkey *et al.* (2007).  $n = 5-6 \pm \text{SE}$

| Parameters ( $C_i$ basis) | Catuaí                       |                              |                              |                              |
|---------------------------|------------------------------|------------------------------|------------------------------|------------------------------|
|                           | February                     |                              | August                       |                              |
|                           | 390 $\mu\text{mol mol}^{-1}$ | 550 $\mu\text{mol mol}^{-1}$ | 390 $\mu\text{mol mol}^{-1}$ | 550 $\mu\text{mol mol}^{-1}$ |
| $V_{\text{cmax}}$         | 39.2 $\pm$ 1.9               | 37.0 $\pm$ 4.7               | 29.2 $\pm$ 1.3               | 35.1 $\pm$ 4.5               |
| $J_{\text{max}}$          | 73.8 $\pm$ 11.4              | 68.9 $\pm$ 7.8               | -                            | -                            |
| $C_i$                     | 248 $\pm$ 11                 | 345 $\pm$ 15                 | 194 $\pm$ 13                 | 260 $\pm$ 18                 |
| $C_{i\_trans}$            | 390 $\pm$ 19                 | 371 $\pm$ 18                 | -                            | -                            |
|                           | Obatã                        |                              |                              |                              |
|                           | February                     |                              | August                       |                              |
|                           | 390 $\mu\text{mol mol}^{-1}$ | 550 $\mu\text{mol mol}^{-1}$ | 390 $\mu\text{mol mol}^{-1}$ | 550 $\mu\text{mol mol}^{-1}$ |
| $V_{\text{cmax}}$         | 41.3 $\pm$ 2.9               | 35.8 $\pm$ 2.9               | 25.6 $\pm$ 3.5               | 30.5 $\pm$ 1.9               |
| $J_{\text{max}}$          | 70.4 $\pm$ 12.4              | 67.1 $\pm$ 8.2               | -                            | -                            |
| $C_i$                     | 225 $\pm$ 14                 | 387 $\pm$ 21                 | 177 $\pm$ 17                 | 211 $\pm$ 34                 |
| $C_{i\_trans}$            | 355 $\pm$ 12                 | 385 $\pm$ 12                 | -                            | -                            |

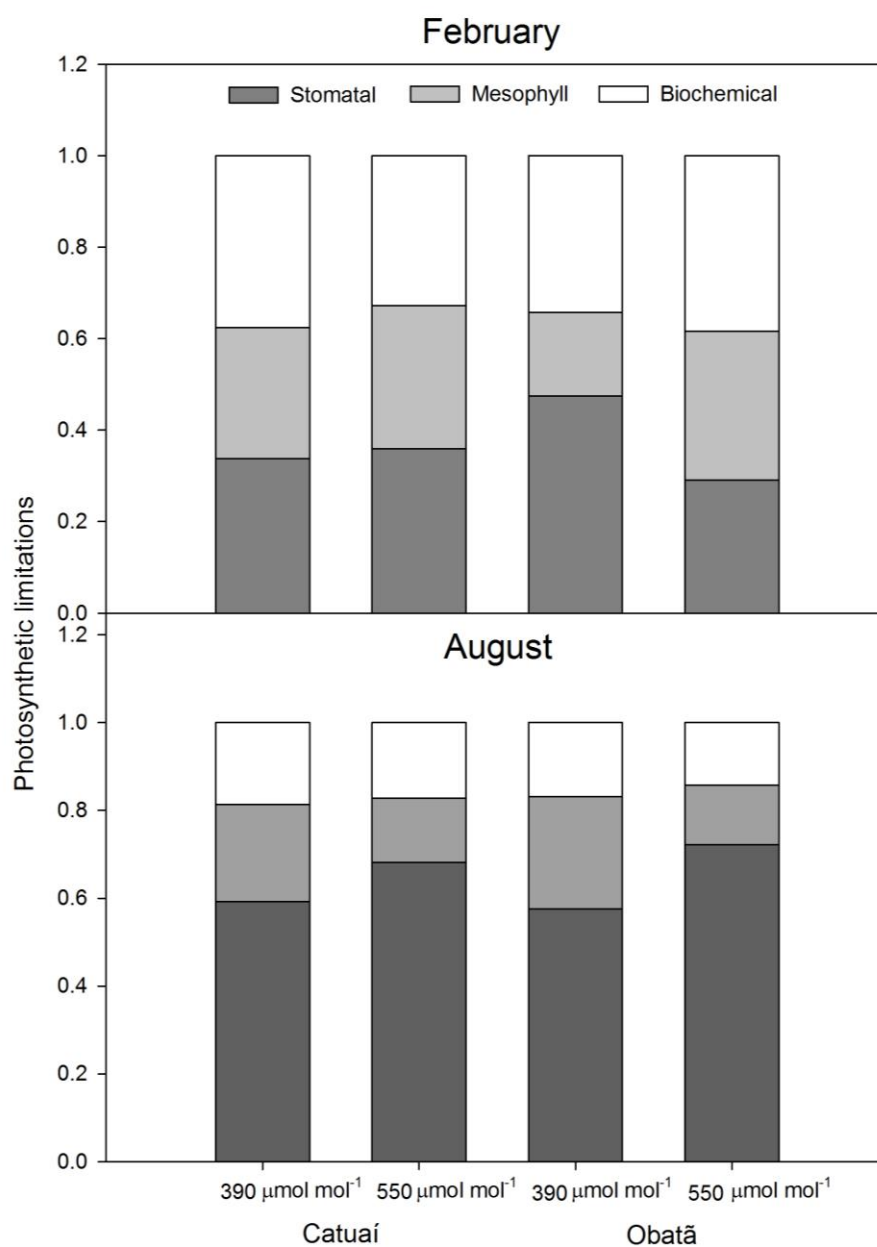

**Supplementary Figure S2.** The effect of elevated ( $550 \mu\text{mol mol}^{-1}$ ) or ambient ( $390 \mu\text{mol mol}^{-1}$ )  $[\text{CO}_2]$  on the overall limitations to photosynthesis of two coffee cultivars (Catuaí and Obatã) growing in a FACE trial during the growing season (February) and winter (August): stomatal ( $l_s$ ), mesophyll ( $l_m$ ) and biochemical ( $l_b$ ) limitations. For these estimations, different ambient  $[\text{CO}_2]$  were used:  $390 \mu\text{mol mol}^{-1}$  air for the plants grown at  $550 \mu\text{mol mol}^{-1}$  air and vice-versa.  $n = 5-6 \pm \text{SE}$
